# Supplementary material for: Heterotic grouping of wheat hybrids based on general and specific combining ability from line × tester analysis
Source: PeerJ. 2024 Sep 25;12:e18136. doi: 10.7717/peerj.18136 (PMC11438435; doi:10.7717/peerj.18136)
Supplement: Supplemental Information 1 [file peerj-12-18136-s001.xlsx]

## Sheet: HG-F1
Combination	Mean	SCA	HT	HB		Parents	Mean	GCA	HT	HB
NZFE-64/Tekirdag	646	12.269	-9.59	-9.9		NZFE-64	717	123.787	3.74667	-6.78667
NZFE-64/Renan	703	-27.315	10.02	-1.95		NZFE-63	264	145.565	67.89	24.7133
NZFE-64/Esperia	656	15.046	10.81	-8.51		NZFE-62	607	50.343	1.16333	-6.84333
NZFE-63/Tekirdag	564	-91.176	15.57	-20.79		4162-28	283	71.009	38.2167	2.06
NZFE-63/Renan	768	16.574	86.18	36.9		4166-1	378	-135.213	-13.42	-27.1867
NZFE-63/Esperia	738	74.602	101.92	58.03		4164-36	261	-135.213	1.46333	-24.5533
NZFE-62/Tekirdag	601	41.046	-8.87	-15.59		NZFE-25	453	-132.213	-21.8533	-30.7833
NZFE-62/Renan	542	-114.87	-7.19	-10.71		NZFE-38	809	25.787	-16.0033	-29.5033
NZFE-62/Esperia	642	73.824	19.55	5.77		NZFE-55	426	-130.213	-18.8733	-29.51
4162-28/Tekirdag	847	265.713	70.25	18.96		NZFMT-14	628	28.231	-2.53667	-11.1133
4162-28/Renan	750	72.796	77.73	33.69		NZFMT-15	449	148.343	36.58	24.16
4162-28/Esperia	250	-338.509	-33.33	-46.47		NZFMT-21	404	-60.213	0	-13.1533
4166-1/Tekirdag	311	-63.398	-42.94	-56.32		TEKIRDAG	712	-34.602	-11.8058	-28.8592
4166-1/Renan	596	125.352	26.94	6.24		RENAN	561	61.648	20.0683	0.559167
4166-1/Esperia	320	-61.954	-24.26	-31.48		ESPERIA	467	-27.046	-3.825	0
4164-36/Tekirdag	215	-160.065	-55.81	-69.8
4164-36/Renan	585	113.685	42.34	4.28
4164-36/Esperia	429	46.38	17.86	-8.14
NZFE-25/Tekirdag	538	160.269	-7.64	-24.44
NZFE-25/Renan	490	15.685	-3.35	-12.66
NZFE-25/Esperia	209	-175.954	-54.57	-55.25
NZFE-38/Tekirdag	302	-234.065	-60.29	-62.67
NZFE-38/Renan	796	164.019	16.2	-1.61
NZFE-38/Esperia	613	70.046	-3.92	-24.23
NZFE-55/Tekirdag	564	184.602	-0.88	-20.79
NZFE-55/Renan	366	-110.315	-25.84	-34.76
NZFE-55/Esperia	313	-74.287	-29.9	-32.98
NZFMT-14/Tekirdag	368	-170.176	-45.07	-48.31
NZFMT-14/Renan	631	-3.093	6.14	0.48
NZFMT-14/Esperia	719	173.269	31.32	14.49
NZFMT-15/Tekirdag	694	36.046	19.55	-2.53
NZFMT-15/Renan	601	-153.87	19.01	7.13
NZFMT-15/Esperia	784	117.824	71.18	67.88
NZFMT-21/Tekirdag	469	18.935	-15.95	-34.13
NZFMT-21/Renan	447	-98.648	-7.36	-20.32
NZFMT-21/Esperia	537	79.713	23.31	14.99

## Sheet: HG-F2
Combination	Mean	SCA	HT	HB		Parents	Mean	GCA	HT	HB
NZFE-64/Tekirdag	540	-42.954	-12.34	-19.64		NZFE-64	672	-60.241	-5.46333	-13.2433
NZFE-64/Renan	583	15.407	-11.8	-13.24		NZFE-63	580	24.204	16.2933	10.61
NZFE-64/Esperia	626	27.546	7.75	-6.85		NZFE-62	578	32.537	18.2567	12.4833
NZFE-63/Tekirdag	680	12.269	19.3	17.24		4162-28	566	-9.352	11.9567	6.89667
NZFE-63/Renan	728	75.63	18.37	12		4166-1	538	-45.019	8.95333	3.40333
NZFE-63/Esperia	595	-87.898	11.21	2.59		4164-36	602	-21.685	7.12	0.873333
NZFE-62/Tekirdag	688	12.269	20.91	19.03		NZFE-25	690	35.648	8.55333	-1.54667
NZFE-62/Renan	700	38.963	14.01	7.69		NZFE-38	622	-40.019	2.48333	-4.14667
NZFE-62/Esperia	640	-51.231	19.85	10.73		NZFE-55	646	-20.574	3.83333	-3.76333
4162-28/Tekirdag	647	13.491	14.92	14.31		NZFMT-14	648	73.426	18.3133	10.4867
4162-28/Renan	672	53.519	10.53	3.38		NZFMT-15	520	-3.685	18.62	12.5533
4162-28/Esperia	583	-67.009	10.42	3		NZFMT-21	616	34.759	14.82	8.14
4166-1/Tekirdag	502	-96.509	-8.56	-10.36		TEKIRDAG	560	-0.269	10.3708	5.515
4166-1/Renan	623	39.852	4.88	-4.15		RENAN	650	-15.296	0.199167	-4.10167
4166-1/Esperia	671	56.657	30.54	24.72		ESPERIA	489	15.565	9.27333	0
4164-36/Tekirdag	591	-30.176	1.72	-1.83
4164-36/Renan	585	-21.481	-6.55	-10
4164-36/Esperia	689	51.657	26.19	14.45
NZFE-25/Tekirdag	688	8.824	10.08	-0.29
NZFE-25/Renan	654	-9.815	-2.39	-5.22
NZFE-25/Esperia	696	0.991	17.97	0.87
NZFE-38/Tekirdag	612	8.491	3.55	-1.61
NZFE-38/Renan	519	-69.148	-18.4	-20.15
NZFE-38/Esperia	680	60.657	22.3	9.32
NZFE-55/Tekirdag	698	75.38	15.75	8.05
NZFE-55/Renan	471	-136.259	-27.31	-27.54
NZFE-55/Esperia	699	60.88	23.06	8.2
NZFMT-14/Tekirdag	721	4.713	19.37	11.27
NZFMT-14/Renan	719	17.741	10.79	10.62
NZFMT-14/Esperia	710	-22.454	24.78	9.57
NZFMT-15/Tekirdag	649	9.491	20.19	15.89
NZFMT-15/Renan	584	-40.148	-0.17	-10.15
NZFMT-15/Esperia	686	30.657	35.84	31.92
NZFMT-21/Tekirdag	703	24.713	19.56	14.12
NZFMT-21/Renan	699	35.741	10.43	7.54
NZFMT-21/Esperia	633	-60.454	14.47	2.76

## Sheet: Parents
Parents	Yield	PH	SL	GNS	GWS	TKW	HI	PH	SL	GNS	GWS	TKW	HI	Yield	Yield	PH	SL	GNS	GWS	TKW	HI
NZFE-64	717	83.5	12.5	60.5	1.717	28.74	34.397	88.8	11.2	60.7	2.519	42.45	50.15	672	694.5	86.15	11.85	60.6	2.118	35.595	42.2735
NZFE-62	607	84.2	12.9	66.9	2.31	29.79	42.277	101.6	11.2	57.6	2.498	39.7	47.536	578	592.5	92.9	12.05	62.25	2.404	34.745	44.9065
NZFE-38	809	77.9	12.1	52.9	2.251	34.46	39.373	92.4	10.9	53.9	2.58	42.92	49.388	622	715.5	85.15	11.5	53.4	2.4155	38.69	44.3805
NZFMT-14	628	79	11.1	54.6	1.511	26.47	37.365	95.6	11.6	64.8	2.812	42.98	50.063	648	638	87.3	11.35	59.7	2.1615	34.725	43.714
TEKIRDAG	712	80.2	11.4	67.1	2.098	32.83	38.883	84.7	10.8	65.6	3.128	42.54	52.327	560	636	82.45	11.1	66.35	2.613	37.685	45.605
RENAN	561	91.7	12.2	54.3	1.847	33.02	35.6	95.1	12.5	65.6	3.027	43.54	49.271	650	605.5	93.4	12.35	59.95	2.437	38.28	42.4355
	672.333	82.75	12.0333	59.3833	1.95567	30.885	37.9825	93.0333	11.3667	61.3667	2.76067	42.355	49.7892	621.667	647	87.8917	11.7	60.375	2.35817	36.62	43.8858
NZFE-63	264	77.5	17	58.9	1.372	29.83	26.621	91.9	10.9	66.3	2.564	35.84	49.442	580	422	84.7	13.95	62.6	1.968	32.835	38.0315
4162-28	283	55.6	11.3	37.1	1.172	32.84	30.574	70.1	10.6	66	2.666	39.48	52.506	566	424.5	62.85	10.95	51.55	1.919	36.16	41.54
NZFMT-15	449	85.5	10.7	51.3	1.631	29.65	34.238	94.5	10.8	61.2	2.935	45.96	51.041	520	484.5	90	10.75	56.25	2.283	37.805	42.6395
	332	72.8667	13	49.1	1.39167	30.7733	30.4777	85.5	10.7667	64.5	2.72167	40.4267	50.9963	555.333	443.667	79.1833	11.8833	56.8	2.05667	35.6	40.737
4166-1	378	64.1	10.7	42.6	1.367	28.15	32.808	71.6	9.7	56.9	1.98	41.18	49.333	538	458	67.85	10.2	49.75	1.6735	34.665	41.0705
4164-36	261	54.5	10.6	53.2	1.781	31.58	34.588	71.4	10.7	64	2.644	39.43	52.326	602	431.5	62.95	10.65	58.6	2.2125	35.505	43.457
NZFE-25	453	79.8	11.8	52.3	1.66	34.65	35.468	92.1	12	63.1	2.697	43.11	49.559	690	571.5	85.95	11.9	57.7	2.1785	38.88	42.5135
NZFE-55	426	81.3	12.2	58.2	1.818	30.6	41.009	88.6	11.2	62.5	2.519	38.11	48.023	646	536	84.95	11.7	60.35	2.1685	34.355	44.516
NZFMT-21	404	87.9	11.9	50.6	1.34	31.44	26.176	93	11.4	66.3	2.991	48.25	50.498	616	510	90.45	11.65	58.45	2.1655	39.845	38.337
ESPERIA	467	78.5	9.1	56.9	1.956	35.33	38.697	87.1	9.8	69.6	3.085	45.54	50.448	489	478	82.8	9.45	63.25	2.5205	40.435	44.5725
	398.167	74.35	11.05	52.3	1.65367	31.9583	34.791	83.9667	10.8	63.7333	2.65267	42.6033	50.0312	596.833	497.5	79.1583	10.925	58.0167	2.15317	37.2808	42.4111

## Sheet: GCA-F1
	PH		SL		GNS		GWS		TKW		HI		Yield
Parents	GCA	Mean	GCA	Mean	GCA	Mean	GCA	Mean	GCA	Mean	GCA	Mean	GCA	Mean
NZFE-64	-0.119	83.5	-0.456	12.5	-1.685	60.5	-0.114	1.717	-0.233	28.74	0.139	34.397	123.787	717
NZFE-62	8.859	84.2	0.688	12.9	-0.574	66.9	-0.228	2.31	-0.862	29.79	2.806	42.277	50.343	607
NZFE-38	3.215	77.9	-0.645	12.1	2.904	52.9	0.242	2.251	0.345	34.46	1.685	39.373	25.787	809
NZFMT-14	2.759	79	0.21	11.1	7.448	54.6	0.174	1.511	-1.195	26.47	1.724	37.365	28.231	628
TEKIRDAG	-0.205	80.2	-0.084	11.4	2.301	67.1	0.162	2.098	-0.237	32.83	-0.787	38.883	-34.602	712
RENAN	2.993	91.7	0.632	12.2	-0.169	54.3	0.018	1.847	2.062	33.02	1.159	35.6	61.648	561
	2.917	82.75	0.0575	12.0333	1.70417	59.3833	0.0423333	1.95567	-0.02	30.885	1.121	37.9825	42.5323	672.333
NZFE-63	2.804	77.5	0.432	17	10.048	58.9	0.408	1.372	-1.333	29.83	3.378	26.621	145.565	264
4162-28	-5.341	55.6	0.321	11.3	-12.874	37.1	-0.366	1.172	5.722	32.84	0.933	30.574	71.009	283
NZFMT-15	6.704	85.5	0.71	10.7	11.015	51.3	0.523	1.631	-1.443	29.65	3.284	34.238	148.343	449
	1.389	72.8667	0.487667	13	2.72967	49.1	0.188333	1.39167	0.982	30.7733	2.53167	30.4777	121.639	332
4166-1	-6.885	64.1	-0.101	10.7	-9.196	42.6	-0.349	1.367	0.396	28.15	-4.084	32.808	-135.213	378
4164-36	-10.519	54.5	0.021	10.6	-9.985	53.2	-0.189	1.781	6.794	31.58	-5.278	34.588	-135.213	261
NZFE-25	0.348	79.8	-0.523	11.8	-1.63	52.3	-0.153	1.66	-3.395	34.65	-1.246	35.468	-132.213	453
NZFE-55	-1.041	81.3	-0.656	12.2	-0.763	58.2	-0.377	1.818	-3.446	30.6	-3.809	41.009	-130.213	426
NZFMT-21	-0.785	87.9	-0.001	11.9	5.293	50.6	0.429	1.34	-1.352	31.44	0.47	26.176	-60.213	404
ESPERIA	-2.788	78.5	-0.548	9.1	-2.132	56.9	-0.18	1.956	-1.825	35.33	-0.372	38.697	-27.046	467
	-3.61167	74.35	-0.301333	11.05	-3.06883	52.3	-0.1365	1.65367	-0.471333	31.9583	-2.3865	34.791	-103.352	398.167

## Sheet: GCA-F2
	PH		SL		GNS		GWS		TKW		HI		Yield
Parents	Mean	GCA	Mean	GCA	Mean	GCA	Mean	GCA	Mean	GCA	Mean	GCA	Mean	GCA			Parent	PH	SL	GNS	GWS	TKW	HI	Yield
NZFE-64	88.8	-0.352	11.2	-0.106	60.7	-1.895	2.519	0.169	42.45	0.74	50.15	-1.693	672	-60.241			NZFE-64	-9.75667	-0.0333333	-11.78	-66.13	-34.0067	-22.3233	12.6833
4164-36	71.4	-9.652	10.7	-0.14	64	-1.762	2.644	-0.156	39.43	0.466	52.326	1.879	602	-21.685			4164-36	-12.8733	8.66333	-31.4033	-54.82	-10.6667	-53.6333	-78.4967
NZFE-38	92.4	7.015	10.9	0.416	53.9	4.338	2.58	0.275	42.92	0.298	49.388	0.217	622	-40.019			NZFE-38	-13.9867	-2.28333	-13.25	-46.2167	-30.4833	-25.66	-26.26
NZFE-55	88.6	6.581	11.2	-0.106	62.5	-1.34	2.519	-0.094	38.11	-0.992	48.023	-0.885	646	-20.574			NZFE-55	-19.4167	3.25	-9.53333	-76.3333	-42.8133	-37.3833	-58.59
RENAN	95.1	0.868	12.5	0.194	65.6	-2.906	3.027	-0.177	43.54	0.297	49.271	-1.314	650	-15.296			RENAN	-7.10667	10.4025	-7.4775	-41.2967	-25.1725	-20.0775	-7.98833
	87.26	0.892	11.3	0.0516	61.34	-0.713	2.6578	0.0034	41.29	0.1618	49.8316	-0.3592	638.4	-31.563				-12.628	3.99983	-14.6888	-56.9593	-28.6285	-31.8155	-31.7303
NZFE-63	91.9	-1.03	10.9	0.182	66.3	5.116	2.564	-0.089	35.84	-0.352	49.442	0.832	580	24.204
NZFE-62	101.6	6.426	11.2	-0.118	57.6	-1.018	2.498	-1.04	39.7	-4.064	47.536	-1.85	578	32.537			NZFE-63	-5.17667	8.55333	-2.15667	-23.9833	-34.6467	-18.1867	1.34
NZFE-25	92.1	6.037	12	-0.095	63.1	0.271	2.697	0.192	43.11	0.685	49.559	-1.658	690	35.648			NZFE-62	-6.45333	13.41	-11.5067	-59.0633	-22.89	-13.8433	-14.44
NZFMT-14	95.6	1.281	11.6	0.371	64.8	3.549	2.812	0.275	42.98	0.899	50.063	1.234	648	73.426			NZFE-25	-16.6767	3.83	-17.3633	-77.5567	-47.91	-29.84	-98.12
NZFMT-21	93	2.97	11.4	0.038	66.3	-0.018	2.991	0.056	48.25	0.869	50.498	0.237	616	34.759			NZFMT-14	-8.03333	6.14667	-3.25	-47.93	-38.3167	-25.15	-36.2067
	94.84	3.1368	11.42	0.0756	63.62	1.58	2.7124	-0.1212	41.976	-0.3926	49.4196	-0.241	622.4	40.1148			NZFMT-21	-14.6967	6.63	-1.61333	-25.0133	-39.39	-25.62	-41.3833
																		-10.2073	7.714	-7.178	-46.7093	-36.6307	-22.528	-37.762
4162-28	70.1	-8.307	10.6	0.382	66	-3.573	2.666	-0.204	39.48	-0.042	52.506	-0.226	566	-9.352
4166-1	71.6	-12.907	9.7	-0.851	56.9	-2.618	1.98	-0.146	41.18	1.206	49.333	2.173	538	-45.019			4162-28	-6.58	6.83333	-38.51	-66.49	-12.55	-25.87	-33.0633
NZFMT-15	94.5	1.937	10.8	0.027	61.2	-1.051	2.935	-0.013	45.96	0.288	51.041	-0.258	520	-3.685			4166-1	-3.04	13.0667	-27.6933	-69.5733	-33.07	-47.44	-58.5433
TEKIRDAG	84.7	-1.391	10.8	-0.156	65.6	-0.97	3.128	-0.004	42.54	-0.01	52.327	0.298	560	-0.269			NZFMT-15	-3.68	12.73	8.51667	-19.9833	-37.1333	-16.0367	7.27
ESPERIA	87.1	0.523	9.8	-0.037	69.6	3.877	3.085	0.181	45.54	-0.287	50.448	1.015	489	15.565			TEKIRDAG	-8.67	7.70833	-7.58583	-40.6633	-32.6142	-32.4375	-43.745
	81.6	-4.029	10.34	-0.127	63.86	-0.867	2.7588	-0.0372	42.94	0.231	51.131	0.6004	534.6	-8.552			ESPERIA	-14.3158	2.08833	-24.8225	-76.3133	-38.1825	-32.7317	-54.2192
																		-7.25717	8.48533	-18.019	-54.6047	-30.71	-30.9032	-36.4602

## Sheet: het.groupF1
	PH				SL				GNS				GWS				TKW				HI				Yield
Combination	Mean	SCA	HT	HB	Mean	SCA	HT	HB	Mean	SCA	HT	HB	Mean	SCA	HT	HB	Mean	SCA	HT	HB	Mean	SCA	HT	HB	Mean	SCA	HT	HB
NZFE-64/Tekirdag	77.7	-3.773	-5.13	-6.95	11.8	0.551	-1.67	-5.6	59.5	2.899	-6.74	-11.33	2.24	0.052	17.4	6.77	38.45	3.544	24.9	17.12	43.985	5.31	20.05	13.12	646	12.269	-9.59	-9.9
NZFE-64/Renan	82.8	-1.87	-5.48	-9.71	11.8	-0.232	-4.84	-5.6	53.7	-0.431	-6.45	-11.24	2.029	-0.015	13.86	9.85	33.16	-4.042	7.38	0.42	36.112	-4.508	3.18	1.44	703	-27.315	10.02	-1.95
NZFE-64/Esperia	84.5	5.644	4.32	1.2	9.4	-0.319	-12.96	-24.8	49.7	-2.468	-15.33	-17.85	1.809	-0.037	-1.52	-7.52	33.81	0.498	5.54	-4.3	38.287	-0.802	4.76	-1.06	656	15.046	10.81	-8.51
NZFE-63/Tekirdag	88.8	4.371	12.55	10.72	11.6	-0.538	-18.31	-31.76	69.7	1.366	10.63	3.87	2.923	0.213	68.47	39.32	32.45	-1.356	3.57	-1.16	40.694	-1.22	24.25	4.66	564	-91.176	15.57	-20.79
NZFE-62/Tekirdag	88.4	-2.084	7.54	4.99	13	0.606	6.56	0.78	57.9	0.255	-13.58	-13.71	2.197	0.123	-0.32	-4.89	36.95	2.673	18.01	12.55	43.545	2.204	7.31	3	601	41.046	-8.87	-15.59
NZFE-62/Renan	97.2	3.552	10.45	6	12.7	-0.444	0.79	-1.55	60.6	5.391	0	-9.42	2.112	0.183	1.59	-8.57	35.37	-1.2	12.63	7.12	37.472	-5.815	-3.77	-11.37	542	-114.87	-7.19	-10.71
NZFE-62/Esperia	86.4	-1.468	6.14	2.61	11.8	-0.163	7.27	-8.53	47.6	-5.645	-23.1	-28.85	1.426	-0.306	-33.15	-38.27	31.21	-1.473	-4.15	-11.66	45.367	3.611	12.05	7.31	642	73.824	19.55	5.77
4166-1/Renan	81.6	3.663	4.75	-11.01	13.4	1.012	16.52	9.84	51.8	5.213	6.8	-4.6	1.914	0.106	19.1	3.63	38.61	0.779	26.24	16.93	37.694	1.296	10.2	5.88	596	125.352	26.94	6.24
4164-36/Renan	76.2	1.963	4.24	-16.9	12.5	0.056	9.65	2.46	46.6	0.835	-13.38	-14.18	2.089	0.121	15.16	13.1	44.65	0.425	38.24	35.22	38.782	3.579	10.51	8.94	585	113.685	42.34	4.28
4164-36/Esperia	72.4	3.877	8.87	-7.77	11.5	0.17	16.16	8.49	50.7	6.832	-7.99	-10.9	2.049	0.278	9.63	4.75	40.23	-0.115	20.25	13.87	33.448	-0.224	-8.72	-13.56	429	46.38	17.86	-8.14
NZFE-25/Tekirdag	82.5	0.56	3.13	2.87	11.6	0.418	0	-1.69	66.7	10.077	11.73	-0.6	2.456	0.306	30.71	17.06	30.47	-1.267	-9.69	-12.06	41.487	4.197	11.6	6.7	538	160.269	-7.64	-24.44
NZFE-25/Renan	84.3	-0.87	-1.75	-8.07	11.4	-0.499	-5	-6.56	50.3	-3.887	-5.63	-7.37	2.064	0.059	17.67	11.75	36.31	2.274	7.31	4.79	42.451	3.216	19.47	19.24	490	15.685	-3.35	-12.66
NZFE-38/Esperia	82.3	0.11	5.24	4.84	10.4	-0.23	-1.89	-14.05	61.6	4.877	12.2	8.26	2.474	0.272	17.59	9.91	33.55	-0.343	-3.85	-5.04	45.246	4.612	15.91	14.92	613	70.046	-3.92	-24.23
NZFE-55/Tekirdag	79.8	-0.718	-1.24	-1.85	11.4	0.284	-3.39	-6.56	55	-2.523	-12.28	-18.03	1.971	0.046	0.66	-6.05	30.43	-1.256	-4.05	-7.31	37.855	3.129	-5.23	-7.69	564	184.602	-0.88	-20.79
NZFMT-14/Renan	87.9	0.385	2.93	-4.14	12.8	0.101	9.4	4.92	60.8	-2.431	11.56	11.36	2.356	0.024	40.32	27.56	37.83	1.594	27.18	14.57	43.035	0.83	17.96	15.17	631	-3.093	6.14	0.48
NZFMT-15/Tekirdag	87.2	-1.095	5.19	1.99	12.6	0.184	13.51	10.53	76.9	7.632	29.9	14.61	3.255	0.431	74.53	55.15	33.4	-0.296	6.91	1.74	45.222	3.402	23.69	16.3	694	36.046	19.55	-2.53
NZFMT-15/Renan	91.9	0.407	3.72	0.22	12.3	-0.899	6.96	0.82	60.4	-6.398	14.39	11.23	2.26	-0.42	29.96	22.36	32.28	-3.715	3.02	-2.24	39.358	-4.407	12.71	10.56	601	-153.87	19.01	7.13
NZFMT-21/Tekirdag	82.1	1.327	-2.38	-6.6	10.8	-0.905	-7.69	-9.24	54.8	-8.745	-6.96	-18.33	2.728	-0.003	58.7	30.03	35.57	1.789	10.69	8.35	36.79	-2.216	13.1	-5.38	469	18.935	-15.95	-34.13
NZFMT-21/Esperia	77	-1.19	-7.45	-12.4	12.2	0.926	16.19	2.52	65.6	6.455	21.93	15.29	2.44	0.051	48.06	24.74	30.04	-2.156	-10.02	-14.97	41.517	2.097	27.99	7.29	537	79.713	23.31	14.99
HG-1 Mean	83.7368	0.673211	2.92842	-2.62947	11.8421	0.00415789	2.48737	-3.97789	57.8895	1.016	0.405263	-5.35737	2.25221	0.0781053	22.5484	11.0884	34.9879	-0.191737	9.47947	3.89158	40.4393	0.962684	11.4221	5.02474	584.263	31.7144	8.09	-8.18316
NZFE-63/Renan	86.4	-1.159	2.13	-5.78	13.7	0.845	-6.16	-19.41	67	1.169	18.37	13.75	2.65	0.084	64.6	43.48	34.37	-1.729	9.37	4.09	43.73	-0.129	40.56	22.84	768	16.574	86.18	36.9
NZFE-63/Esperia	78.6	-3.212	0.77	0.13	11.4	-0.307	-12.98	-32.94	61.3	-2.534	5.87	4.07	2.07	-0.298	24.4	5.83	35.3	3.085	8.35	-0.08	43.677	1.349	33.74	12.87	738	74.602	101.92	58.03
4162-28/Tekirdag	76.3	0.016	12.37	-4.86	11.8	-0.26	3.51	3.51	50.9	5.488	-2.3	-24.14	1.826	-0.11	11.68	-12.96	39.5	-1.354	20.3	20.28	43.405	3.936	24.98	11.63	847	265.713	70.25	18.96
4162-28/Renan	78.8	-0.648	6.92	-14.07	12.8	-0.01	8.47	4.92	38.8	-4.143	-15.1	-28.55	1.782	-0.009	18.01	-3.52	44.55	1.397	35.29	34.92	44.903	3.489	35.71	26.13	750	72.796	77.73	33.69
NZFMT-14/Esperia	80.2	-1.534	1.78	1.52	11.5	-0.019	13.86	3.6	60.5	-0.734	8.42	6.33	2.188	0.054	26.18	11.86	33.45	1.097	8.25	-5.32	44.088	3.414	15.93	13.93	719	173.269	31.32	14.49
NZFMT-15/Esperia	86.4	0.688	5.37	1.05	12.7	0.715	28.28	18.69	63.6	-1.234	17.56	11.78	2.472	-0.011	37.79	26.38	36.12	4.012	11.17	2.24	43.239	1.005	18.57	11.74	784	117.824	71.18	67.88
NZFE-38/Renan	84.5	-3.504	-0.35	-7.85	12.3	0.523	0.82	0.82	61.2	2.546	14.18	12.71	2.687	0.288	31.14	19.37	39.32	1.537	16.54	14.1	46.543	4.377	24.16	18.21	796	164.019	16.2	-1.61
HG-2 Mean	81.6	-1.33614	4.14143	-4.26571	12.3143	0.212429	5.11429	-2.97286	57.6143	0.0797143	6.71429	-0.578571	2.23929	-0.000285714	30.5429	12.92	37.5157	1.14929	15.61	10.0329	44.2264	2.49157	27.6643	16.7643	771.714	126.4	64.9686	32.62
4162-28/Esperia	74.3	0.632	10.73	-5.35	11.9	0.27	16.67	5.31	39.6	-1.345	-15.74	-30.4	1.713	0.119	9.53	-12.42	39.23	-0.043	15.09	11.04	32.458	-7.425	-6.29	-16.12	250	-338.509	-33.33	-46.47
4166-1/Tekirdag	77.4	2.694	7.2	-3.49	11.9	0.262	7.21	4.39	44.5	-4.523	-18.94	-33.68	1.931	-0.022	11.43	-7.96	37.25	1.718	22.17	13.46	32.297	-2.155	-9.9	-16.94	311	-63.398	-42.94	-56.32
4166-1/Esperia	65.8	-6.356	-7.71	-16.18	9.9	-1.274	0	-7.48	43.9	-0.69	-11.85	-22.85	1.527	-0.084	-8.12	-21.93	31.45	-2.497	-0.91	-10.98	35.725	0.859	-0.08	-7.68	320	-61.954	-24.26	-31.48
4164-36/Tekirdag	65.2	-5.84	-3.26	-18.7	11.5	-0.227	4.55	0.88	40.6	-7.668	-32.56	-39.49	1.713	-0.399	-11.7	-18.35	41.62	-0.31	29.23	26.77	29.903	-3.355	-18.6	-23.09	215	-160.065	-55.81	-69.8
NZFE-25/Esperia	79.7	0.31	0.63	-0.13	10.8	0.081	2.86	-8.47	46	-6.19	-15.75	-19.16	1.442	-0.366	-20.24	-26.28	29.15	-1.006	-16.69	-17.49	30.291	-7.413	-18.32	-21.72	209	-175.954	-54.57	-55.25
NZFE-38/Tekirdag	88.2	3.394	11.5	9.98	10.8	-0.294	-8.47	-10.74	53.7	-7.423	-10.5	-19.97	1.984	-0.56	-8.78	-11.86	34.29	-1.194	1.92	-0.49	31.231	-8.989	-20.18	-20.68	302	-234.065	-60.29	-62.67
NZFE-55/Renan	82	-1.781	-5.2	-10.58	11.4	-0.432	-6.56	-6.56	54.9	-0.154	-2.49	-5.67	1.409	-0.372	-23.13	-23.71	36.3	2.315	14.12	9.93	34.626	-2.046	-9.6	-15.56	366	-110.315	-25.84	-34.76
NZFE-55/Esperia	80.5	2.499	0.75	-0.98	10.8	0.148	0.93	-11.48	55.7	2.677	-3.3	-4.3	1.909	0.326	1.17	-2.4	29.04	-1.058	-11.91	-17.8	34.058	-1.083	-14.54	-16.95	313	-74.287	-29.9	-32.98
NZFMT-14/Tekirdag	85.5	1.149	7.41	6.61	11.9	-0.082	5.31	4.39	68.9	3.166	13.14	2.68	2.398	-0.078	32.85	14.3	31.25	-2.691	5.4	-4.81	36.016	-4.244	-5.53	-7.37	368	-170.176	-45.07	-48.31
NZFMT-21/Renan	83.9	-0.137	-6.57	-8.51	12.4	-0.021	2.48	1.64	63.4	2.291	20.76	16.76	2.538	-0.048	59.22	37.41	36.45	0.367	13.09	10.39	41.07	0.119	32.96	15.37	447	-98.648	-7.36	-20.32
HG-3 Mean	78.25	-0.3436	1.548	-4.733	11.33	-0.1569	2.498	-2.812	51.12	-1.9859	-7.723	-15.608	1.8564	-0.1484	4.223	-7.32	34.603	-0.4399	7.151	2.002	33.7675	-3.5732	-7.008	-13.074	310.1	-148.737	-37.937	-45.836

## Sheet: het.groupF2
	PH				SL				GNS				GWS				TKW				HI				Yield
Combination	Mean	SCA	HT	HB	Mean	SCA	HT	HB	Mean	SCA	HT	HB	Mean	SCA	HT	HB	Mean	SCA	HT	HB	Mean	SCA	HT	HB	Mean	SCA	HT	HB
NZFE-64/Tekirdag	94.1	6.013	8.47	5.97	10.3	-0.41	-6.36	-8.04	52.5	-6.441	-16.93	-19.97	3.139	-0.173	11.15	0.35	46.43	-0.423	9.25	9.14	46.807	-1.406	-8.65	-10.55	540	-42.954	-12.34	-19.64
4166-1/Tekirdag	73.1	-2.431	-6.46	-13.7	10.5	0.568	1.94	-2.78	61.7	3.515	0.65	-6.52	3.089	0.093	20.95	-1.25	47.64	0.32	13.81	11.99	50.801	-1.278	-0.06	-2.92	502	-96.509	-8.56	-10.36
NZFE-38/Renan	94.5	-3.212	0.8	-0.63	11.4	-0.116	-2.56	-8.8	61.5	-1.738	2.84	-6.25	3.412	0.168	21.68	12.72	47.1	0.385	8.95	8.18	50.437	1.926	2.24	2.12	519	-69.148	-18.4	-20.15
NZFE-55/Renan	95.4	-1.912	3.86	0.32	11.7	0.64	-1.68	-6.4	59.9	2.34	-6.55	-8.69	2.923	0.049	5.41	-3.44	44.68	-0.748	9.43	2.62	46.653	-0.756	-4.1	-5.31	471	-136.259	-27.31	-27.54
HG-1 Mean	89.275	-0.3855	1.6675	-2.01	10.975	0.1705	-2.165	-6.505	58.9	-0.581	-4.9975	-10.3575	3.14075	0.03425	14.7975	2.095	46.4625	-0.1165	10.36	7.9825	48.6745	-0.3785	-2.6425	-4.165	508	-86.2175	-16.6525	-19.4225
NZFE-64/Renan	77.5	-12.845	-15.72	-18.51	10.8	-0.227	-9.24	-13.6	58.9	1.895	-6.8	-10.21	2.998	-0.14	8.11	-0.96	47.87	0.707	11.33	9.94	46.796	0.195	-5.86	-6.69	583	15.407	-11.8	-13.24
NZFE-64/Esperia	96.8	6.832	10.06	9.01	11.4	0.637	8.57	1.79	68.3	4.545	4.75	-1.87	3.808	0.312	35.9	23.44	46.29	-0.283	5.2	1.65	50.141	1.211	-0.31	-0.61	626	27.546	7.75	-6.85
NZFE-63/Esperia	86.9	-2.423	-2.91	-5.44	11.9	0.848	14.42	9.17	74.4	3.634	9.41	6.9	3.401	0.163	20.39	10.24	46.44	0.955	14.13	1.98	52.008	0.553	4.13	3.09	595	-87.898	11.21	2.59
NZFE-62/Esperia	97.8	0.988	3.66	-3.74	10.9	0.148	3.81	-2.68	64.4	-0.299	1.26	-7.47	3.197	0.133	14.51	3.63	43.64	1.867	2.39	-4.17	49.189	0.416	0.4	-2.5	640	-51.231	19.85	10.73
4162-28/Tekirdag	77.2	-2.931	-0.26	-8.85	10.6	-0.532	-0.93	-1.85	51.1	-6.13	-22.34	-22.1	2.575	-0.363	-11.11	-17.68	47.5	1.426	15.83	11.66	48.771	-0.908	-6.96	-7.11	647	13.491	14.92	14.31
4162-28/Esperia	81.3	-0.712	3.44	-6.66	11.6	0.281	13.73	9.43	65.5	3.39	-3.39	-5.89	3.39	0.267	17.87	9.89	44.98	-0.818	5.81	-1.23	51.463	1.066	-0.03	-1.99	583	-67.009	10.42	3
4166-1/Renan	84.9	7.11	1.86	-10.73	10.4	0.084	-6.31	-16.8	55.7	-0.582	-9.14	-15.61	2.901	0.078	15.85	-4.16	48.64	1.017	14.83	11.71	51.962	1.495	5.4	5.33	623	39.852	4.88	-4.15
4164-36/Tekirdag	78.5	-0.32	0.58	-7.32	10.7	0.056	-0.93	-0.93	60	0.959	-7.41	-8.54	3.061	0.075	6.06	-2.14	47.95	1.367	16.98	12.72	53.597	1.813	2.43	2.43	591	-30.176	1.72	-1.83
4164-36/Renan	82.4	1.321	-1.02	-13.35	11.1	0.106	-4.31	-11.2	55	-2.171	-15.12	-16.16	2.791	-0.022	-1.59	-7.8	46.5	-0.387	12.08	6.8	48.36	-1.812	-4.8	-7.58	585	-21.481	-6.55	-10
NZFE-25/Renan	97.4	0.699	4.06	2.42	10.8	-0.205	-12.2	-13.6	57.7	-1.471	-10.4	-12.04	3.056	-0.105	6.78	0.96	45.55	-1.559	5.12	4.62	45.851	-0.784	-7.21	-7.48	654	-9.815	-2.39	-5.22
NZFE-38/Tekirdag	98.7	3.246	11.46	6.82	11.5	0.268	5.5	5.5	70.6	5.393	18.06	7.62	3.477	0.059	21.83	11.16	47.24	0.826	10.55	10.07	50.145	0.023	-1.4	-4.17	612	8.491	3.55	-1.61
NZFMT-15/Tekirdag	89.8	-0.576	0.22	-4.97	10.7	-0.077	-0.93	-0.93	62.6	2.781	-1.26	-4.57	3.29	0.16	8.51	5.18	46.59	0.192	5.29	1.37	51.524	1.876	-0.31	-1.53	649	9.491	20.19	15.89
NZFMT-15/Renan	95.8	3.199	1.05	0.74	11.2	0.073	-4.27	-10.4	58.1	0.284	-8.36	-11.43	3.073	0.116	3.09	1.52	46.85	0.139	4.69	1.94	47.937	-0.099	-4.42	-6.08	584	-40.148	-0.17	-10.15
NZFMT-21/Esperia	92.9	-0.39	3.16	-0.11	10.6	-0.307	0	-7.02	66.4	0.734	-2.35	-4.6	3.442	0.059	13.3	11.57	48.27	1.568	2.92	0.04	51.902	1.042	2.83	2.78	633	-60.454	14.47	2.76
HG-2 Mean	88.4214	0.228429	1.40286	-4.335	11.0143	0.0823571	0.493571	-3.79429	62.05	0.925857	-3.79214	-7.56929	3.17571	0.0565714	11.3929	3.20357	46.7364	0.501214	9.08214	4.93571	49.9747	0.434786	-1.15071	-2.29357	614.643	-18.1381	6.28929	-0.269286
NZFE-63/Tekirdag	89.1	1.691	0.91	-3.05	10.4	-0.566	-4.59	-4.59	59	-6.919	-10.61	-10.06	2.873	-0.18	0.95	-8.15	46.43	0.669	18.47	9.14	49.195	-1.542	-3.32	-5.99	680	12.269	19.3	17.24
NZFE-63/Renan	90.4	0.732	-3.32	-4.94	11	-0.282	-5.98	-12	67.3	3.284	1.97	2.59	2.898	0.018	3.65	-4.26	44.44	-1.625	11.97	2.07	50.114	0.989	1.53	1.36	728	75.63	18.37	12
NZFE-62/Tekirdag	94.4	-0.498	1.34	-7.09	10.4	-0.266	-5.45	-7.14	58.7	-1.152	-4.71	-11.46	2.781	-0.098	-1.14	-11.09	37.43	-4.623	-8.97	-12.01	48.269	0.213	-3.33	-7.76	688	12.269	20.91	19.03
NZFE-62/Renan	96.6	-0.49	-1.78	-4.92	11.1	0.118	-6.72	-11.2	59.3	1.451	-3.73	-10.56	2.67	-0.035	-3.37	-11.79	45.11	2.757	8.39	3.61	45.815	-0.629	-5.35	-7.01	700	38.963	14.01	7.69
4162-28/Renan	86	3.644	4.12	-9.57	11.8	0.251	1.72	-5.6	58.1	2.74	-11.7	-11.43	2.861	0.096	0.49	-5.48	45.77	-0.608	10.26	5.12	47.91	-0.158	-5.85	-8.75	672	53.519	10.53	3.38
4166-1/Esperia	72.8	-4.679	-8.25	-16.42	9.4	-0.652	-4.08	-4.08	60.1	-2.932	-5.06	-13.65	3.011	-0.171	18.87	-2.4	45.71	-1.337	5.42	0.37	52.579	-0.217	5.39	4.22	671	56.657	30.54	24.72
4164-36/Esperia	79.7	-1.001	0.57	-8.5	10.6	-0.163	2.91	-0.93	65.1	1.212	-2.54	-6.47	3.118	-0.053	8.83	1.07	45.32	-0.98	6.66	-0.48	52.501	-0.001	2.17	0.33	689	51.657	26.19	14.45
NZFE-25/Tekirdag	94.7	0.257	7.13	2.82	11.2	0.512	-1.75	-6.67	62.2	1.126	-3.42	-5.18	3.422	0.087	17.47	9.4	48.5	1.701	13.24	12.5	47.158	-1.09	-7.43	-9.88	688	8.824	10.08	-0.29
NZFE-25/Esperia	95.4	-0.956	6.47	3.58	10.5	-0.307	-3.67	-12.5	66.3	0.345	-0.15	-4.74	3.537	0.018	22.35	14.65	46.38	-0.142	4.62	1.84	50.839	1.874	1.67	0.78	696	0.991	17.97	0.87
NZFE-38/Esperia	97.3	-0.034	8.41	5.3	11.2	-0.152	7.69	2.75	66.4	-3.655	7.44	-4.6	3.375	-0.227	19.13	9.4	44.92	-1.211	1.56	-1.36	48.89	-1.949	-2.06	-3.09	680	60.657	22.3	9.32
NZFE-55/Tekirdag	95.6	0.58	10.33	7.9	10.2	-0.477	-7.27	-8.93	59.2	-0.33	-7.64	-9.76	2.976	-0.072	5.38	-4.86	44.8	-0.324	11.08	5.31	50.158	1.137	-0.03	-4.15	698	75.38	15.75	8.05
NZFE-55/Esperia	98.3	1.332	11.9	10.95	10.6	-0.163	0.95	-5.36	62.3	-2.01	-5.75	-10.49	3.256	0.023	16.2	5.54	45.92	1.072	9.78	0.83	49.356	-0.382	0.24	-2.16	699	60.88	23.06	8.2
NZFMT-14/Tekirdag	86.5	-3.22	-4.05	-9.52	11.7	0.545	4.46	0.86	68.1	3.748	4.45	3.81	3.761	0.343	26.63	20.24	46.71	-0.305	9.24	8.68	52.581	1.441	2.71	0.49	721	4.713	19.37	11.27
NZFMT-14/Renan	91.5	-0.445	-4.04	-4.29	11.1	-0.371	-8.26	-11.2	60.6	-1.849	-7.06	-7.62	3.149	-0.095	7.84	4.03	47.98	0.664	10.91	10.2	49.924	0.396	0.52	-0.28	719	17.741	10.79	10.62
NZFMT-14/Esperia	95.3	3.666	4.32	-0.31	11.1	-0.174	3.74	-4.31	67.3	-1.899	0.15	-3.3	3.354	-0.248	13.73	8.72	46.38	-0.359	4.79	1.84	50.019	-1.837	-0.47	-0.85	710	-22.454	24.78	9.57
NZFMT-15/Esperia	89.7	-2.623	-1.21	-5.08	10.9	0.004	5.83	0.93	61.6	-3.066	-5.81	-11.49	3.038	-0.276	0.93	-1.52	45.79	-0.331	0.09	-0.37	48.589	-1.777	-4.25	-4.8	686	30.657	35.84	31.92
NZFMT-21/Tekirdag	89.6	-1.809	0.84	-3.66	11.2	0.379	0.9	-1.75	64.3	3.448	-2.58	-3.02	3.268	0.069	6.8	4.48	46.16	-0.825	1.67	-4.33	49.864	-0.279	-3.01	-4.71	703	24.713	19.56	14.12
NZFMT-21/Renan	95.9	2.199	1.97	0.84	11.1	-0.071	-7.5	-11.2	54.7	-4.182	-17.12	-17.5	2.898	-0.127	-3.69	-4.26	46.55	-0.742	1.42	-3.52	47.767	-0.763	-4.25	-5.41	699	35.741	10.43	7.54
HG-3 Mean	91.0444	-0.0918889	1.98111	-2.55333	10.8611	-0.101944	-1.50389	-5.71778	62.2556	-0.591111	-4.10389	-7.49611	3.12478	-0.0515556	8.94722	1.31778	45.5722	-0.363833	6.7	2.19111	49.5293	-0.254111	-1.39556	-3.20333	695.944	33.2671	19.4322	11.65

## Sheet: Parents-HG
	PH		SL		GNS		GWS		TKW		HI		Yield
Parents	Mean	GCA	Mean	GCA	Mean	GCA	Mean	GCA	Mean	GCA	Mean	GCA	Mean	GCA
NZFE-64	83.5	-0.119	12.5	-0.456	60.5	-1.685	1.717	-0.114	28.74	-0.233	34.397	0.139	717	123.787
NZFE-63	77.5	2.804	17	0.432	58.9	10.048	1.372	0.408	29.83	-1.333	26.621	3.378	264	145.565
NZFE-62	84.2	8.859	12.9	0.688	66.9	-0.574	2.31	-0.228	29.79	-0.862	42.277	2.806	607	50.343
4162-28	55.6	-5.341	11.3	0.321	37.1	-12.874	1.172	-0.366	32.84	5.722	30.574	0.933	283	71.009
4166-1	64.1	-6.885	10.7	-0.101	42.6	-9.196	1.367	-0.349	28.15	0.396	32.808	-4.084	378	-135.213
4164-36	54.5	-10.519	10.6	0.021	53.2	-9.985	1.781	-0.189	31.58	6.794	34.588	-5.278	261	-135.213
NZFE-25	79.8	0.348	11.8	-0.523	52.3	-1.63	1.66	-0.153	34.65	-3.395	35.468	-1.246	453	-132.213
NZFE-38	77.9	3.215	12.1	-0.645	52.9	2.904	2.251	0.242	34.46	0.345	39.373	1.685	809	25.787
NZFE-55	81.3	-1.041	12.2	-0.656	58.2	-0.763	1.818	-0.377	30.6	-3.446	41.009	-3.809	426	-130.213
NZFMT-14	79	2.759	11.1	0.21	54.6	7.448	1.511	0.174	26.47	-1.195	37.365	1.724	628	28.231
NZFMT-15	85.5	6.704	10.7	0.71	51.3	11.015	1.631	0.523	29.65	-1.443	34.238	3.284	449	148.343
NZFMT-21	87.9	-0.785	11.9	-0.001	50.6	5.293	1.34	0.429	31.44	-1.352	26.176	0.47	404	-60.213
TEKIRDAG	80.2	-0.205	11.4	-0.084	67.1	2.301	2.098	0.162	32.83	-0.237	38.883	-0.787	712	-34.602
RENAN	91.7	2.993	12.2	0.632	54.3	-0.169	1.847	0.018	33.02	2.062	35.6	1.159	561	61.648
ESPERIA	78.5	-2.788	9.1	-0.548	56.9	-2.132	1.956	-0.18	35.33	-1.825	38.697	-0.372	467	-27.046
	PH		SL		GNS		GWS		TKW		HI		Yield
Parents	Mean	GCA	Mean	GCA	Mean	GCA	Mean	GCA	Mean	GCA	Mean	GCA	Mean	GCA
NZFE-64	88.8	-0.352	11.2	-0.106	60.7	-1.895	2.519	0.169	42.45	0.74	50.15	-1.693	672	-60.241
NZFE-63	91.9	-1.03	10.9	0.182	66.3	5.116	2.564	-0.089	35.84	-0.352	49.442	0.832	580	24.204
NZFE-62	101.6	6.426	11.2	-0.118	57.6	-1.018	2.498	-1.04	39.7	-4.064	47.536	-1.85	578	32.537
4162-28	70.1	-8.307	10.6	0.382	66	-3.573	2.666	-0.204	39.48	-0.042	52.506	-0.226	566	-9.352
4166-1	71.6	-12.907	9.7	-0.851	56.9	-2.618	1.98	-0.146	41.18	1.206	49.333	2.173	538	-45.019
4164-36	71.4	-9.652	10.7	-0.14	64	-1.762	2.644	-0.156	39.43	0.466	52.326	1.879	602	-21.685
NZFE-25	92.1	6.037	12	-0.095	63.1	0.271	2.697	0.192	43.11	0.685	49.559	-1.658	690	35.648
NZFE-38	92.4	7.015	10.9	0.416	53.9	4.338	2.58	0.275	42.92	0.298	49.388	0.217	622	-40.019
NZFE-55	88.6	6.581	11.2	-0.106	62.5	-1.34	2.519	-0.094	38.11	-0.992	48.023	-0.885	646	-20.574
NZFMT-14	95.6	1.281	11.6	0.371	64.8	3.549	2.812	0.275	42.98	0.899	50.063	1.234	648	73.426
NZFMT-15	94.5	1.937	10.8	0.027	61.2	-1.051	2.935	-0.013	45.96	0.288	51.041	-0.258	520	-3.685
NZFMT-21	93	2.97	11.4	0.038	66.3	-0.018	2.991	0.056	48.25	0.869	50.498	0.237	616	34.759
TEKIRDAG	84.7	-1.391	10.8	-0.156	65.6	-0.97	3.128	-0.004	42.54	-0.01	52.327	0.298	560	-0.269
RENAN	95.1	0.868	12.5	0.194	65.6	-2.906	3.027	-0.177	43.54	0.297	49.271	-1.314	650	-15.296
ESPERIA	87.1	0.523	9.8	-0.037	69.6	3.877	3.085	0.181	45.54	-0.287	50.448	1.015	489	15.565

## Sheet: HGP-1
Parent	Yield	GCA	HT	HB
NZFE-64	717	123.787	3.74667	-6.78667
NZFE-62	607	50.343	1.16333	-6.84333
NZFE-38	809	25.787	-16.0033	-29.5033
NZFMT-14	628	28.231	-2.53667	-11.1133
TEKIRDAG	712	-34.602	-11.8058	-28.8592
RENAN	561	61.648	20.0683	0.559167
	672.333	42.5323	-0.894583	-13.7578
NZFE-63	264	145.565	67.89	24.7133
4162-28	283	71.009	38.2167	2.06
NZFMT-15	449	148.343	36.58	24.16
	332	121.639	47.5622	16.9778
4166-1	378	-135.213	-13.42	-27.1867
4164-36	261	-135.213	1.46333	-24.5533
NZFE-25	453	-132.213	-21.8533	-30.7833
NZFE-55	426	-130.213	-18.8733	-29.51
NZFMT-21	404	-60.213	0	-13.1533
ESPERIA	467	-27.046	-3.825	0
	398.167	-103.352	-9.41806	-20.8644

## Sheet: HGP-2
Parent	Yield	GCA	HT	HB
NZFE-64	672	-60.241	-5.46333	-13.2433
NZFE-63	580	24.204	16.2933	10.61
NZFE-62	578	32.537	18.2567	12.4833
4162-28	566	-9.352	11.9567	6.89667
4166-1	538	-45.019	8.95333	3.40333
4164-36	602	-21.685	7.12	0.873333
NZFE-25	690	35.648	8.55333	-1.54667
NZFE-38	622	-40.019	2.48333	-4.14667
NZFE-55	646	-20.574	3.83333	-3.76333
NZFMT-14	648	73.426	18.3133	10.4867
NZFMT-15	520	-3.685	18.62	12.5533
NZFMT-21	616	34.759	14.82	8.14
TEKIRDAG	560	-0.269	10.3708	5.515
RENAN	650	-15.296	0.199167	-4.10167
ESPERIA	489	15.565	9.27333	0

[truncated: 2 more sheets: HT-HB P-1, HT-HB P-2]
