# Supplementary material for: Heterotic grouping of wheat hybrids based on general and specific combining ability from line × tester analysis
Source: PeerJ. 2024 Sep 25;12:e18136. doi: 10.7717/peerj.18136 (PMC11438435; doi:10.7717/peerj.18136)
Supplement: Supplemental Information 2 [file peerj-12-18136-s002.docx]

**Suppl. Table 1.** Line x tester variance analyses for examined traits

| SOV | DF | PH | | SL | | GNS | | GWS | | TGW | | HI | | GY | |
| --- | --- | --- | --- | --- | --- | --- | --- | --- | --- | --- | --- | --- | --- | --- | --- |
|  |  | F1 | F2 | F1 | F2 | F1 | F2 | F1 | F2 | F1 | F2 | F1 | F2 | F1 | F2 |
| Replication | 2 | 1.16ns | 61.88ns | 0.67ns | 0.89ns | 47.62* | 3.71ns | 22.31* | 4364.52ns | 1538.67ns | 10.46ns | 3.71ns | 22.31* | 4364.52ns | 1538.67ns |
| Genotypes | 50 | 200.79** | 200.91** | 3.98** | 1.02** | 228.05** | 79.36** | 10.67** | 92152.83** | 13171.90** | 26.85** | 79.36** | 10.67** | 92152.83** | 13171.90** |
| Parents | 14 | 358.11** | 276.41** | 8.70** | 1.57** | 185.27** | 67.72** | 6.483ns | 88769.25** | 10078.56** | 31.08** | 67.72** | 6.48ns | 88769.25** | 10078.56** |
| Interaction | 1 | 608.97** | 119.09ns | 0.00ns | 0.22ns | 68.40* | 538.54** | 8.584ns | 79241.27** | 64122.51** | 522.33** | 538.54** | 8.58ns | 79241.27** | 64122.51** |
| Crosses | 35 | 126.19** | 173.04** | 2.20** | 0.82** | 249.73** | 70.89** | 12.41** | 93875.16** | 12953.51** | 11.00** | 70.89** | 12.41** | 93875.16** | 12953.51** |
| Lines | 11 | 276.25** | 420.90** | 2.17ns | 1.05ns | 548.70** | 79.84ns | 16.78* | 116331.48ns | 14536.24ns | 18.04ns | 79.84ns | 16.78* | 116331.48ns | 14536.24ns |
| Testers | 2 | 301.86** | 53.29ns | 12.73** | 1.14ns | 177.66ns | 37.81ns | 51.22** | 103127.12ns | 8573.62ns | 3.06ns | 37.81ns | 51.22** | 103127.12ns | 8573.62ns |
| Line x Tester | 22 | 35.20** | 59.99* | 1.26** | 0.68** | 106.80** | 69.43** | 6.70ns | 81805.92** | 12560.32** | 8.20ns | 69.43** | 6.70ns | 81805.92** | 12560.32** |
| Error | 100 | 10.34 | 31.96 | 0.47 | 0.31 | 12.24 | 4.43 | 6.03 | 2355.40 | 1314.16 | 5.06 | 4.43 | 6.03 | 2355.40 | 1314.16 |

*P<0,05 , ** P < 0,01 (SOV: Source of variation; DF: Degree of freedom; PH: Plant height; SL: Spike length; GNS: Grain number per spike; GWS: Grain weight per spike; TGW: Thousand grain weight; HI: Harvest index; GY: Grain yield)
