# Supplementary material for: Heterotic grouping of wheat hybrids based on general and specific combining ability from line × tester analysis
Source: PeerJ. 2024 Sep 25;12:e18136. doi: 10.7717/peerj.18136 (PMC11438435; doi:10.7717/peerj.18136)
Supplement: Supplemental Information 4 [file peerj-12-18136-s004.docx]

**Suppl. Table 3.** General combining ability effects of parents for yield-related characteristics

| **Parents** | **PH** | | **SL** | | **GNS** | | **GWS** | | **TGW** | | **HI** | | **GY** | |
| --- | --- | --- | --- | --- | --- | --- | --- | --- | --- | --- | --- | --- | --- | --- |
| **F1** | **F2** | **F1** | **F2** | **F1** | **F2** | **F1** | **F2** | **F1** | **F2** | **F1** | **F2** | **F1** | **F2** |
| NZFE-64 | -0.12 | -0.35 | -0.46 | -0.11 | -1.68 | -1.89 | -0.11 | 0.17 | -0.23 | 0.74 | 0.14 | -1.69* | 123.79** | -60.24** |
| NZFE-63 | 2.80* | -1.03 | 0.43 | 0.18 | 10.05** | 5.12* | 0.41** | -0.09 | -1.33 | -0.35 | 3.38** | 0.83 | 145.56** | 24.20* |
| NZFE-62 | 8.86** | 6.43** | 0.69** | -0.12 | -0.57 | -1.02 | -0.23** | -0.26* | -0.86 | -4.06** | 2.81** | -1.85* | 50.34** | 32.54** |
| 4162-28 | -5.34** | -8.31** | 0.32 | 0.38* | -12.87** | -3.57 | -0.37** | -0.20 | 5.72** | -0.04 | 0.93 | -0.23 | 71.01** | -9.35 |
| 4166-1 | -6.88** | -12.91** | -0.10 | -0.85** | -9.20** | -2.62 | -0.35** | -0.15 | 0.40 | 1.21 | -4.08** | 2.17** | -135.21** | -45.02** |
| 4164-36 | -10.52** | -9.65** | 0.02 | -0.14 | -9.98** | -1.76 | -0.19* | -0.16 | 6.79** | 0.47 | -5.28** | 1.88* | -135.21** | -21.68 |
| NZFE-25 | 0.35 | 6.04** | -0.52** | -0.09 | -1.63 | 0.27 | -0.15* | 0.19 | -3.39** | 0.68 | -1.25 | -1.66* | -132.21** | 35.65** |
| NZFE-38 | 3.21** | 7.02** | -0.64** | 0.42* | 2.90** | 4.34* | 0.24** | 0.27** | 0.34 | 0.30 | 1.68* | 0.22 | 25.79 | -40.02** |
| NZFE-55 | -1.04 | 6.58** | -0.66** | -0.11 | -0.76 | -1.34 | -0.38** | -0.09 | -3.45** | -0.99 | -3.81** | -0.88 | -130.21** | -20.57 |
| NZFMT-14 | 2.76* | 1.28 | 0.21 | 0.37* | 7.45** | 3.55 | 0.17* | 0.27** | -1.19 | 0.90 | 1.72* | 1.23 | 28.23 | 73.43** |
| NZFMT-15 | 6.70** | 1.94 | 0.71** | 0.03 | 11.01** | -1.05 | 0.52** | -0.01 | -1.44 | 0.29 | 3.28** | -0.26 | 148.34** | -3.68 |
| NZFMT-21 | -0.78 | 2.97 | -0.00 | 0.04 | 5.29** | -0.02 | 0.43** | 0.06 | -1.35 | 0.87 | 0.47 | 0.24 | -60.21** | 34.76** |
| TEKİRDAĞ | -0.20 | -1.39 | -0.08 | -0.16 | 2.30** | -0.97 | 0.16** | -0.00 | -0.24 | -0.01 | -0.79* | 0.30 | -34.60** | -0.27 |
| RENAN | 2.99** | 0.87 | 0.63** | 0.19* | -0.17 | -2.91** | 0.02 | -0.18** | 2.06** | 0.30 | 1.16** | -1.31** | 61.65** | -15.30* |
| ESPERİA | -2.79** | 0.52 | -0.55** | -0.04 | -2.13** | 3.88** | -0.18** | 0.18** | -1.82** | -0.29 | -0.37 | 1.01* | -27.05** | 15.56* |

*P<0,05 , ** P < 0,01 (PH: Plant height; SL: Spike length; GNS: Grain number per spike; GWS: Grain weight per spike; TGW: Thousand grain weight; HI: Harvest index; GY: Grain yield)
