# Supplementary material for: Heterotic grouping of wheat hybrids based on general and specific combining ability from line × tester analysis
Source: PeerJ. 2024 Sep 25;12:e18136. doi: 10.7717/peerj.18136 (PMC11438435; doi:10.7717/peerj.18136)
Supplement: Supplemental Information 6 [file peerj-12-18136-s006.docx]

**Suppl. Table 5.** Specific combining ability effects of hybrids for yield-related characteristics.

| **Hybrids** | **PH** | | **SL** | | **GNS** | | **GWS** | | **TGW** | | **HI** | | **GY** | |
| --- | --- | --- | --- | --- | --- | --- | --- | --- | --- | --- | --- | --- | --- | --- |
| **F1** | **F2** | **F1** | **F2** | **F1** | **F2** | **F1** | **F2** | **F1** | **F2** | **F1** | **F2** | **F1** | **F2** |
| NZFE-64/Tekirdağ | -3.77* | 6.01 | 0.55 | -0.41 | 2.90 | -6.44 | 0.05 | -0.17 | 3.54** | -0.42 | 5.31** | -1.41 | 12.27 | -42.95* |
| NZFE-64/Renan | -1.87 | -12.84** | -0.23 | -0.23 | -0.43 | 1.89 | -0.01 | -0.14 | -4.04** | 0.71 | -4.51** | 0.19 | -27.31 | 15.41 |
| NZFE-64/Esperia | 5.64** | 6.83* | -0.32 | 0.64 | -2.47 | 4.54 | -0.04 | 0.31 | 0.50 | -0.28 | -0.80 | 1.21 | 15.05 | 27.55 |
| NZFE-63/Tekirdağ | 4.37* | 1.69 | -0.54 | -0.57 | 1.37 | -6.92 | 0.21 | -0.18 | -1.36 | 0.67 | -1.22 | -1.54 | -91.18** | 12.27 |
| NZFE-63/Renan | -1.16 | 0.73 | 0.84* | -0.28 | 1.17 | 3.28 | 0.08 | 0.02 | -1.73 | -1.62 | -0.13 | 0.99 | 16.57 | 75.63** |
| NZFE-63/Esperia | -3.21 | -2.42 | -0.31 | 0.85* | -2.53 | 3.63 | -0.30* | 0.16 | 3.08* | 0.95 | 1.35 | 0.55 | 74.60** | -87.90** |
| NZFE-62/Tekirdağ | -2.08 | -0.50 | 0.61 | -0.27 | 0.25 | -1.15 | 0.12 | -0.10 | 2.67* | -4.62** | 2.20 | 0.21 | 41.05 | 12.27 |
| NZFE-62/Renan | 3.55 | -0.49 | -0.44 | 0.12 | 5.39** | 1.45 | 0.18 | -0.03 | -1.20 | 2.76* | -5.81** | -0.63 | -114.87** | 38.96 |
| NZFE-62/Esperia | -1.47 | 0.99 | -0.16 | 0.15 | -5.64** | -0.30 | -0.31* | 0.13 | -1.47 | 1.87 | 3.61** | 0.42 | 73.82** | -51.23** |
| 4162-28/Tekirdağ | 0.02 | -2.93 | -0.26 | -0.53 | 5.49** | -6.13 | -0.11 | -0.36* | -1.35 | 1.43 | 3.94** | -0.91 | 265.71** | 13.49 |
| 4162-28/Renan | -0.65 | 3.64 | -0.01 | 0.25 | -4.14* | 2.74 | -0.01 | 0.10 | 1.40 | -0.61 | 3.49** | -0.16 | 72.80* | 53.52** |
| 4162-28/Esperia | 0.63 | -0.71 | 0.27 | 0.28 | -1.34 | 3.39 | 0.12 | 0.27 | -0.04 | -0.82 | -7.42** | 1.07 | -338.51** | -67.01** |
| 4166-1/Tekirdağ | 2.69 | -2.43 | 0.26 | 0.57 | -4.52* | 3.51 | -0.02 | 0.09 | 1.72 | 0.32 | -2.15 | -1.28 | -63.40* | -96.51** |
| 4166-1/Renan | 3.66 | 7.11* | 1.01* | 0.08 | 5.21* | -0.58 | 0.11 | 0.08 | 0.78 | 1.02 | 1.30 | 1.49 | 125.35** | 39.85 |
| 4166-1/Esperia | -6.36** | -4.68 | -1.27** | -0.65* | -0.69 | -2.93 | -0.08 | -0.17 | -2.50 | -1.34 | 0.86 | -0.22 | -61.95* | 56.66** |
| 4164-36/Tekirdağ | -5.84** | -0.32 | -0.23 | 0.06 | -7.67** | 0.96 | -0.40** | 0.07 | -0.31 | 1.37 | -3.35** | 1.81 | -160.06** | -30.18 |
| 4164-36/Renan | 1.96 | 1.32 | 0.06 | 0.11 | 0.83 | -2.17 | 0.12 | -0.02 | 0.42 | -0.39 | 3.58** | -1.81 | 113.68** | -21.48 |
| 4164-36/Esperia | 3.88* | -1.00 | 0.17 | -0.16 | 6.83** | 1.21 | 0.28* | -0.05 | -0.11 | -0.98 | -0.22 | -0.00 | 46.38 | 51.66* |
| NZFE-25/Tekirdağ | 0.56 | 0.26 | 0.42 | 0.51 | 10.08** | 1.13 | 0.31* | 0.09 | -1.27 | 1.70 | 4.20** | -1.09 | 160.27** | 8.82 |
| NZFE-25/Renan | -0.87 | 0.70 | -0.50 | -0.20 | -3.89 | -1.47 | 0.06 | -0.10 | 2.27 | -1.56 | 3.22** | -0.78 | 15.68 | -9.81 |
| NZFE-25/Esperia | 0.31 | -0.96 | 0.08 | -0.31 | -6.19** | 0.34 | -0.37** | 0.02 | -1.01 | -0.14 | -7.41** | 1.87 | -175.95** | 0.99 |
| NZFE-38/Tekirdağ | 3.39 | 3.25 | -0.29 | 0.27 | -7.42** | 5.39 | -0.56** | 0.06 | -1.19 | 0.83 | -8.99** | 0.02 | -234.06** | 8.49 |
| NZFE-38/Renan | -3.50 | -3.21 | 0.52 | -0.12 | 2.55 | -1.74 | 0.29* | 0.17 | 1.54 | 0.38 | 4.38** | 1.93 | 164.02** | -69.15** |
| NZFE-38/Esperia | 0.11 | -0.03 | -0.23 | -0.15 | 4.88* | -3.65 | 0.27* | -0.23 | -0.34 | -1.21 | 4.61** | -1.95 | 70.05* | 60.66** |
| NZFE-55/Tekirdağ | -0.72 | 0.58 | 0.28 | -0.48 | -2.52 | -0.33 | 0.05 | -0.07 | -1.26 | -0.32 | 3.13* | 1.14 | 184.60** | 75.38** |
| NZFE-55/Renan | -1.78 | -1.91 | -0.43 | 0.64 | -0.15 | 2.34 | -0.37** | 0.05 | 2.31 | -0.75 | -2.05 | -0.76 | -110.31** | -136.26** |
| NZFE-55/Esperia | 2.50 | 1.33 | 0.15 | -0.16 | 2.68 | -2.01 | 0.33* | 0.02 | -1.06 | 1.07 | -1.08 | -0.38 | -74.29** | 60.88** |
| NZFMT-14/Tekirdağ | 1.15 | -3.22 | -0.08 | 0.54 | 3.17 | 3.75 | -0.08 | 0.34 | -2.69* | -0.30 | -4.24** | 1.44 | -170.18** | 4.71 |
| NZFMT-14/Renan | 0.38 | -0.44 | 0.10 | -0.37 | -2.43 | -1.85 | 0.02 | -0.09 | 1.59 | 0.66 | 0.83 | 0.40 | -3.09 | 17.74 |
| NZFMT-14/Esperia | -1.53 | 3.67 | -0.02 | -0.17 | -0.73 | -1.90 | 0.05 | -0.25 | 1.10 | -0.36 | 3.41** | -1.84 | 173.27** | -22.45 |
| NZFMT-15/Tekirdağ | -1.09 | -0.58 | 0.18 | -0.08 | 7.63** | 2.78 | 0.43** | 0.16 | -0.30 | 0.19 | 3.40** | 1.88 | 36.05 | 9.49 |
| NZFMT-15/Renan | 0.41 | 3.20 | -0.90* | 0.07 | -6.40** | 0.28 | -0.42** | 0.12 | -3.71** | 0.14 | -4.41** | -0.10 | -153.87** | -40.15 |
| NZFMT-15/Esperia | 0.69 | -2.62 | 0.71 | 0.00 | -1.23 | -3.07 | -0.01 | -0.28 | 4.01** | -0.33 | 1.00 | -1.78 | 117.82** | 30.66 |
| NZFMT-21/Tekirdağ | 1.33 | -1.81 | -0.90* | 0.38 | -8.74** | 3.45 | -0.00 | 0.07 | 1.79 | -0.82 | -2.22 | -0.28 | 18.93 | 24.71 |
| NZFMT-21/Renan | -0.14 | 2.20 | -0.02 | -0.07 | 2.29 | -4.18 | -0.05 | -0.13 | 0.37 | -0.74 | 0.12 | -0.76 | -98.65** | 35.74 |
| NZFMT-21/Esperia | -1.19 | -0.39 | 0.93* | -0.31 | 6.45** | 0.73 | 0.05 | 0.06 | -2.16 | 1.57 | 2.10 | 1.04 | 79.71** | -60.45** |

*P<0,05 , ** P < 0,01 (PH: Plant height; SL: Spike length; GNS: Grain number per spike; GWS: Grain weight per spike; TGW: Thousand grain weight; HI: Harvest index; GY: Grain yield)
