# Supplementary material for: Heterotic grouping of wheat hybrids based on general and specific combining ability from line × tester analysis
Source: PeerJ. 2024 Sep 25;12:e18136. doi: 10.7717/peerj.18136 (PMC11438435; doi:10.7717/peerj.18136)
Supplement: Supplemental Information 7 [file peerj-12-18136-s007.docx]

**Suppl. Table 6.** Heterosis values of hybrids for yield-related characteristics

| **Hybrids** | **PH** | | **SL** | | **GNS** | | **GWS** | | **TGW** | | **HI** | | **GY** | |
| --- | --- | --- | --- | --- | --- | --- | --- | --- | --- | --- | --- | --- | --- | --- |
| **F1** | **F2** | **F1** | **F2** | **F1** | **F2** | **F1** | **F2** | **F1** | **F2** | **F1** | **F2** | **F1** | **F2** |
| NZFE-64/Tekirdağ | -5.13 | 8.47** | -1.67 | -6.36* | -6.74 | -16.93** | 17.40 | 11.15* | 24.90** | 9.25** | 20.05** | -8.65** | -9.59 | -12.34** |
| NZFE-64/Renan | -5.48* | -15.72** | -4.84 | -9.24** | -6.45 | -6.80* | 13.86 | 8.11** | 7.38 | 11.33** | 3.18 | -5.86** | 10.02 | -11.80** |
| NZFE-64/Esperia | 4.32 | 10.06** | -12.96** | 8.57** | -15.33* | 4.75 | -1.52 | 35.90** | 5.54 | 5.20* | 4.76 | -0.31 | 10.81 | 7.75 |
| NZFE-63/Tekirdağ | 12.55** | 0.91 | -18.31** | -4.59 | 10.63 | -10.61** | 68.47** | 0.95 | 3.57 | 18.47** | 24.25** | -3.32** | 15.57 | 19.30** |
| NZFE-63/Renan | 2.13 | -3.32 | -6.16* | -5.98* | 18.37** | 1.97 | 64.60** | 3.65 | 9.37 | 11.97** | 40.56** | 1.53** | 86.18** | 18.37** |
| NZFE-63/Esperia | 0.77 | -2.91 | -12.98** | 14.42** | 5.87 | 9.41** | 24.40* | 20.39** | 8.35 | 14.13** | 33.74** | 4.13** | 101.92** | 11.21* |
| NZFE-62/Tekirdağ | 7.54** | 1.34 | 6.56 | -5.45* | -13.58* | -4.71 | -0.32 | -1.14 | 18.01** | -8.97** | 7.31 | -3.33** | -8.87 | 20.91** |
| NZFE-62/Renan | 10.45** | -1.78 | 0.79 | -6.72** | 0.00 | -3.73 | 1.59 | -3.37 | 12.63* | 8.39** | -3.77 | -5.35** | -7.19 | 14.01** |
| NZFE-62/Esperia | 6.14* | 3.66 | 7.27 | 3.81 | -23.10** | 1.26 | -33.15** | 14.51** | -4.15 | 2.39 | 12.05** | 0.40 | 19.55 | 19.85** |
| 4162-28/Tekirdağ | 12.37** | -0.26 | 3.51 | -0.93 | -2.30 | -22.34** | 11.68 | -11.11** | 20.30** | 15.83** | 24.98** | -6.96** | 70.25** | 14.92** |
| 4162-28/Renan | 6.92* | 4.12 | 8.47* | 1.72 | -15.10 | -11.70** | 18.01 | 0.49 | 35.29** | 10.26** | 35.71** | -5.85** | 77.73** | 10.53* |
| 4162-28/Esperia | 10.73** | 3.44 | 16.67** | 13.73** | -15.74* | -3.39 | 9.53 | 17.87** | 15.09* | 5.81** | -6.29 | -0.03 | -33.33 | 10.42* |
| 4166-1/Tekirdağ | 7.20* | -6.46 | 7.21 | 1.94 | -18.94** | 0.65 | 11.43 | 20.95** | 22.17** | 13.81** | -9.90* | -0.06 | -42.94** | -8.56 |
| 4166-1/Renan | 4.75 | 1.86 | 16.52** | -6.31* | 6.80 | -9.14** | 19.10 | 15.85** | 26.24** | 14.83** | 10.20* | 5.40** | 26.94* | 4.88 |
| 4166-1/Esperia | -7.71* | -8.25* | 0.00 | -4.08 | -11.85 | -5.06 | -8.12 | 18.87** | -0.91 | 5.42* | -0.08 | 5.39** | -24.26 | 30.54** |
| 4164-36/Tekirdağ | -3.26 | 0.58 | 4.55 | -0.93 | -32.56** | -7.41** | -11.70 | 6.06* | 29.23** | 16.98** | -18.60** | 2.43** | -55.81** | 1.72 |
| 4164-36/Renan | 4.24 | -1.02 | 9.65** | -4.31 | -13.38* | -15.12** | 15.16 | -1.59 | 38.24** | 12.08** | 10.51* | -4.80** | 42.34** | -6.55 |
| 4164-36/Esperia | 8.87** | 0.57 | 16.16** | 2.91 | -7.99 | -2.54 | 9.63 | 8.83** | 20.25** | 6.66** | -8.72 | 2.17** | 17.86 | 26.19** |
| NZFE-25/Tekirdağ | 3.13 | 7.13* | 0.00 | -1.75 | 11.73* | -3.42 | 30.71** | 17.47** | -9.69 | 13.24** | 11.60* | -7.43** | -7.64 | 10.08* |
| NZFE-25/Renan | -1.75 | 4.06 | -5.00 | -12.20** | -5.63 | -10.40** | 17.67 | 6.78* | 7.31 | 5.12* | 19.47** | -7.21** | -3.35 | -2.39 |
| NZFE-25/Esperia | 0.63 | 6.47* | 2.86 | -3.67 | -15.75* | -0.15 | -20.24* | 22.35** | -16.69** | 4.62* | -18.32** | 1.67** | -54.57** | 17.97** |
| NZFE-38/Tekirdağ | 11.50** | 11.46** | -8.47* | 5.50* | -10.50 | 18.06** | -8.78 | 21.83** | 1.92 | 10.55** | -20.18** | -1.40** | -60.29** | 3.55 |
| NZFE-38/Renan | -0.35 | 0.80 | 0.82 | -2.56 | 14.18* | 2.84 | 31.14** | 21.68** | 16.54** | 8.95** | 24.16** | 2.24** | 16.20 | -18.40** |
| NZFE-38/Esperia | 5.24 | 8.41** | -1.89 | 7.69** | 12.20 | 7.44** | 17.59* | 19.13** | -3.85 | 1.56 | 15.91** | -2.06** | -3.92 | 22.30** |
| NZFE-55/Tekirdağ | -1.24 | 10.33** | -3.39 | -7.27** | -12.28* | -7.64** | 0.66 | 5.38 | -4.05 | 11.08** | -5.23 | -0.03 | -0.88 | 15.75** |
| NZFE-55/Renan | -5.20* | 3.86 | -6.56 | -1.68 | -2.49 | -6.55* | -23.13* | 5.41 | 14.12* | 9.43** | -9.60* | -4.10** | -25.84* | -27.31** |
| NZFE-55/Esperia | 0.75 | 11.90** | 0.93 | 0.95 | -3.30 | -5.75* | 1.17 | 16.20** | -11.91* | 9.78** | -14.54** | 0.24 | -29.90* | 23.06** |
| NZFMT-14/Tekirdağ | 7.41** | -4.05 | 5.31 | 4.46 | 13.14* | 4.45 | 32.85** | 26.63** | 5.40 | 9.24** | -5.53 | 2.71** | -45.07** | 19.37** |
| NZFMT-14/Renan | 2.93 | -4.04 | 9.40** | -8.26** | 11.56 | -7.06** | 40.32** | 7.84** | 27.18** | 10.91** | 17.96** | 0.52 | 6.14 | 10.79** |
| NZFMT-14/Esperia | 1.78 | 4.32 | 13.86** | 3.74 | 8.42 | 0.15 | 26.18* | 13.73** | 8.25 | 4.79* | 15.93** | -0.47 | 31.32** | 24.78** |
| NZFMT-15/Tekirdağ | 5.19* | 0.22 | 13.51** | -0.93 | 29.90** | -1.26 | 74.53** | 8.51** | 6.91 | 5.29* | 23.69** | -0.31 | 19.55 | 20.19** |
| NZFMT-15/Renan | 3.72 | 1.05 | 6.96 | -4.27 | 14.39* | -8.36** | 29.96** | 3.09 | 3.02 | 4.69* | 12.71* | -4.42** | 19.01 | -0.17 |
| NZFMT-15/Esperia | 5.37* | -1.21 | 28.28** | 5.83* | 17.56** | -5.81* | 37.79** | 0.93 | 11.17 | 0.09 | 18.57** | -4.25** | 71.18** | 35.84** |
| NZFMT-21/Tekirdağ | -2.38 | 0.84 | -7.69* | 0.90 | -6.96 | -2.58 | 58.70** | 6.80* | 10.69 | 1.67 | 13.10* | -3.01** | -15.95 | 19.56** |
| NZFMT-21/Renan | -6.57** | 1.97 | 2.48 | -7.50** | 20.76** | -17.12** | 59.22** | -3.69 | 13.09* | 1.42 | 32.96** | -4.25** | -7.36 | 10.43* |
| NZFMT-21/Esperia | -7.45** | 3.16 | 16.19** | 0.00 | 21.93** | -2.35 | 48.06** | 13.30** | -10.02 | 2.92 | 27.99** | 2.83** | 23.31 | 14.47** |

*P<0,05 , ** P < 0,01 (PH: Plant height; SL: Spike length; GNS: Grain number per spike; GWS: Grain weight per spike; TGW: Thousand grain weight; HI: Harvest index; GY: Grain yield)

Table 7. Heterobeltiosis values of hybrids for yield-related characteristics

| **Hybrids** | **PH** | | **SL** | | **GNS** | | **GWS** | | **TGW** | | **HI** | | **GY** | |
| --- | --- | --- | --- | --- | --- | --- | --- | --- | --- | --- | --- | --- | --- | --- |
| **F1** | **F2** | **F1** | **F2** | **F1** | **F2** | **F1** | **F2** | **F1** | **F2** | **F1** | **F2** | **F1** | **F2** |
| NZFE-64/Tekirdağ | -6.95* | 5.97 | -5.60 | -8.04** | -11.33 | -19.97** | 6.77 | 0.35 | 17.12* | 9.14** | 13.12* | -10.55** | -9.90 | -19.64** |
| NZFE-64/Renan | -9.71** | -18.51** | -5.60 | -13.60** | -11.24 | -10.21** | 9.85 | -0.96 | 0.42 | 9.94** | 1.44 | -6.69** | -1.95 | -13.24** |
| NZFE-64/Esperia | 1.20 | 9.01* | -24.80** | 1.79 | -17.85** | -1.87 | -7.52 | 23.44** | -4.30 | 1.65 | -1.06 | -0.61 | -8.51 | -6.85 |
| NZFE-63/Tekirdağ | 10.72** | -3.05 | -31.76** | -4.59 | 3.87 | -10.06** | 39.32** | -8.15** | -1.16 | 9.14** | 4.66 | -5.99** | -20.79* | 17.24** |
| NZFE-63/Renan | -5.78* | -4.94 | -19.41** | -12.00** | 13.75* | 2.59 | 43.48** | -4.26 | 4.09 | 2.07 | 22.84** | 1.36** | 36.90** | 12.00** |
| NZFE-63/Esperia | 0.13 | -5.44 | -32.94** | 9.17** | 4.07 | 6.90* | 5.83* | 10.24** | -0.08 | 1.98 | 12.87* | 3.09** | 58.03** | 2.59 |
| NZFE-62/Tekirdağ | 4.99 | -7.09* | 0.78 | -7.14* | -13.71* | -11.46** | -4.89 | -11.09** | 12.55 | -12.01** | 3.00 | -7.76** | -15.59 | 19.03** |
| NZFE-62/Renan | 6.00* | -4.92 | -1.55 | -11.20** | -9.42 | -10.56** | -8.57 | -11.79** | 7.12 | 3.61 | -11.37* | -7.01** | -10.71 | 7.69 |
| NZFE-62/Esperia | 2.61 | -3.74 | -8.53* | -2.68 | -28.85** | -7.47** | -38.27** | 3.63 | -11.66 | -4.17 | 7.31 | -2.50** | 5.77 | 10.73* |
| 4162-28/Tekirdağ | -4.86 | -8.85* | 3.51 | -1.85 | -24.14** | -22.10** | -12.96 | -17.68** | 20.28** | 11.66** | 11.63* | -7.11** | 18.96 | 14.31** |
| 4162-28/Renan | -14.07** | -9.57** | 4.92 | -5.60* | -28.55** | -11.43** | -3.52 | -5.48 | 34.92** | 5.12* | 26.13** | -8.75** | 33.69* | 3.38 |
| 4162-28/Esperia | -5.35 | -6.66 | 5.31 | 9.43** | -30.40** | -5.89* | -12.42 | 9.89** | 11.04 | -1.23 | -16.12** | -1.99** | -46.47** | 3.00 |
| 4166-1/Tekirdağ | -3.49 | -13.70** | 4.39 | -2.78 | -33.68** | -6.52* | -7.96 | -1.25 | 13.46 | 11.99** | -16.94** | -2.92** | -56.32** | -10.36* |
| 4166-1/Renan | -11.01** | -10.73** | 9.84* | -16.80** | -4.60 | -15.61** | 3.63 | -4.16 | 16.93* | 11.71** | 5.88 | 5.33** | 6.24 | -4.15 |
| 4166-1/Esperia | -16.18** | -16.42** | -7.48 | -4.08 | -22.85** | -13.65** | -21.93 | -2.40 | -10.98 | 0.37 | -7.68 | 4.22** | -31.48* | 24.72** |
| 4164-36/Tekirdağ | -18.70** | -7.32* | 0.88 | -0.93 | -39.49** | -8.54** | -18.35 | -2.14 | 26.77** | 12.72** | -23.09** | 2.43** | -69.80** | -1.83 |
| 4164-36/Renan | -16.90** | -13.35** | 2.46 | -11.20** | -14.18 | -16.16** | 13.10 | -7.80* | 35.22** | 6.80** | 8.94 | -7.58** | 4.28 | -10.00* |
| 4164-36/Esperia | -7.77* | -8.50* | 8.49 | -0.93 | -10.90 | -6.47* | 4.75 | 1.07 | 13.87* | -0.48 | -13.56** | 0.33 | -8.14 | 14.45** |
| NZFE-25/Tekirdağ | 2.87 | 2.82 | -1.69 | -6.67* | -0.60 | -5.18 | 17.06** | 9.40** | -12.06 | 12.50** | 6.70 | -9.88** | -24.44* | -0.29 |
| NZFE-25/Renan | -8.07** | 2.42 | -6.56 | -13.60** | -7.37 | -12.04** | 11.75 | 0.96 | 4.79 | 4.62 | 19.24** | -7.48** | -12.66 | -5.22 |
| NZFE-25/Esperia | -0.13 | 3.58 | -8.47* | -12.50** | -19.16** | -4.74 | -26.28* | 14.65** | -17.49** | 1.84 | -21.72** | 0.78* | -55.25** | 0.87 |
| NZFE-38/Tekirdağ | 9.98** | 6.82* | -10.74** | 5.50 | -19.97** | 7.62* | -11.86 | 11.16** | -0.49 | 10.07** | -20.68** | -4.17** | -62.67** | -1.61 |
| NZFE-38/Renan | -7.85** | -0.63 | 0.82 | -8.80** | 12.71 | -6.25* | 19.37** | 12.72** | 14.10* | 8.18** | 18.21** | 2.12** | -1.61 | -20.15** |
| NZFE-38/Esperia | 4.84 | 5.30 | -14.05** | 2.75 | 8.26 | -4.60 | 9.91* | 9.40** | -5.04 | -1.36 | 14.92** | -3.09** | -24.23** | 9.32* |
| NZFE-55/Tekirdağ | -1.85 | 7.90* | -6.56 | -8.93** | -18.03** | -9.76** | -6.05 | -4.86 | -7.31 | 5.31* | -7.69 | -4.15** | -20.79* | 8.05 |
| NZFE-55/Renan | -10.58** | 0.32 | -6.56 | -6.40* | -5.67 | -8.69** | -23.71* | -3.44 | 9.93 | 2.62 | -15.56** | -5.31** | -34.76** | -27.54** |
| NZFE-55/Esperia | -0.98 | 10.95** | -11.48** | -5.36 | -4.30 | -10.49** | -2.40 | 5.54 | -17.80** | 0.83 | -16.95** | -2.16** | -32.98* | 8.20 |
| NZFMT-14/Tekirdağ | 6.61* | -9.52** | 4.39 | 0.86 | 2.68 | 3.81 | 14.30** | 20.24** | -4.81 | 8.68** | -7.37 | 0.49 | -48.31** | 11.27* |
| NZFMT-14/Renan | -4.14 | -4.29 | 4.92 | -11.20** | 11.36 | -7.62* | 27.56** | 4.03 | 14.57* | 10.20** | 15.17** | -0.28 | 0.48 | 10.62* |
| NZFMT-14/Esperia | 1.52 | -0.31 | 3.60 | -4.31 | 6.33 | -3.30 | 11.86* | 8.72** | -5.32 | 1.84 | 13.93** | -0.85** | 14.49 | 9.57* |
| NZFMT-15/Tekirdağ | 1.99 | -4.97 | 10.53* | -0.93 | 14.61 | -4.57 | 55.15** | 5.18 | 1.74 | 1.37 | 16.30** | -1.53** | -2.53 | 15.89** |
| NZFMT-15/Renan | 0.22 | 0.74 | 0.82 | -10.40** | 11.23 | -11.43** | 22.36** | 1.52 | -2.24 | 1.94 | 10.56 | -6.08** | 7.13 | -10.15* |
| NZFMT-15/Esperia | 1.05 | -5.08 | 18.69** | 0.93 | 11.78 | -11.49** | 26.38** | -1.52 | 2.24 | -0.37 | 11.74* | -4.80** | 67.88** | 31.92** |
| NZFMT-21/Tekirdağ | -6.60* | -3.66 | -9.24* | -1.75 | -18.33** | -3.02 | 30.03** | 4.48 | 8.35 | -4.33 | -5.38 | -4.71** | -34.13** | 14.12** |
| NZFMT-21/Renan | -8.51** | 0.84 | 1.64 | -11.20** | 16.76* | -17.50** | 37.41** | -4.26 | 10.39 | -3.52 | 15.37** | -5.41** | -20.32 | 7.54 |
| NZFMT-21/Esperia | -12.40** | -0.11 | 2.52 | -7.02* | 15.29* | -4.60 | 24.74** | 11.57** | -14.97* | 0.04 | 7.29 | 2.78** | 14.99 | 2.76 |

Table 8. Inbreeding depression values of hybrids for yield-related characteristics

| **Hybrids** | **PH** | **SL** | **GNS** | **GWS** | **TGW** | **HI** | **GY** |
| --- | --- | --- | --- | --- | --- | --- | --- |
| NZFE-64/Tekirdağ | -21.11** | 12.71** | 11.76** | -40.13** | -20.75** | -6.42* | 16.41** |
| NZFE-64/Renan | 6.40* | 8.47** | -9.68* | -47.76** | -44.36** | -29.59** | 17.07** |
| NZFE-64/Esperia | -14.56** | -21.28** | -37.42** | -110.50** | -36.91** | -30.96** | 4.57 |
| NZFE-63/Tekirdağ | -0.34 | 10.34** | 15.35** | 1.71 | -43.08** | -20.89** | -20.57** |
| NZFE-63/Renan | -4.63 | 19.71** | -0.45 | -9.36 | -29.30** | -14.60** | 5.21* |
| NZFE-63/Esperia | -10.56** | -4.39 | -21.37** | -64.30** | -31.56** | -19.07** | 19.38** |
| NZFE-62/Tekirdağ | -6.79** | 20.00** | -1.38 | -26.58** | -1.30 | -10.85** | -14.48** |
| NZFE-62/Renan | 0.62 | 12.60** | 2.15 | -26.42** | -27.54** | -22.26** | -29.15** |
| NZFE-62/Esperia | -13.19** | 7.63** | -35.29** | -124.19** | -39.83** | -8.42** | 0.31 |
| 4162-28/Tekirdağ | -1.18 | 10.17** | -0.39 | -41.02** | -20.25** | -12.36** | 23.61** |
| 4162-28/Renan | -9.14** | 7.81** | -49.74** | -60.55** | -2.74 | -6.70** | 10.40** |
| 4162-28/Esperia | -9.42** | 2.52 | -65.40** | -97.90** | -14.66** | -58.55** | -133.20** |
| 4166-1/Tekirdağ | 5.56* | 11.76** | -38.65** | -59.97** | -27.89** | -57.29** | -61.41** |
| 4166-1/Renan | -4.04 | 22.39** | -7.53 | -51.57** | -25.98** | -37.85** | -4.53 |
| 4166-1/Esperia | -10.64** | 5.05 | -36.90** | -97.18** | -45.34** | -47.18** | -109.69** |
| 4164-36/Tekirdağ | -20.40** | 6.96** | -47.78** | -78.69** | -15.21** | -79.24** | -174.88** |
| 4164-36/Renan | -8.14** | 11.20** | -18.03** | -33.60** | -4.14 | -24.70** | 0.00 |
| 4164-36/Esperia | -10.08** | 7.83** | -28.40** | -52.17** | -12.65** | -56.96** | -60.61** |
| NZFE-25/Tekirdağ | -14.79** | 3.45 | 6.75 | -39.33** | -59.17** | -13.67** | -27.88** |
| NZFE-25/Renan | -15.54** | 5.26* | -14.71** | -48.06** | -25.45** | -8.01** | -33.47** |
| NZFE-25/Esperia | -19.70** | 2.78 | -44.13** | -145.28** | -59.11** | -67.84** | -233.01** |
| NZFE-38/Tekirdağ | -11.90** | -6.48* | -31.47** | -75.25** | -37.77** | -60.56** | -102.65** |
| NZFE-38/Renan | -11.83** | 7.32** | -0.49 | -26.98** | -19.79** | -8.37** | 34.80** |
| NZFE-38/Esperia | -18.23** | -7.69** | -7.79* | -36.42** | -33.89** | -8.05** | -10.93** |
| NZFE-55/Tekirdağ | -19.80** | 10.53** | -7.64 | -50.99** | -47.22** | -32.50** | -23.76** |
| NZFE-55/Renan | -16.34** | -2.63 | -9.11* | -107.45** | -23.09** | -34.73** | -28.69** |
| NZFE-55/Esperia | -22.11** | 1.85 | -11.85** | -70.56** | -58.13** | -44.92** | -123.32** |
| NZFMT-14/Tekirdağ | -1.17 | 1.68 | 1.16 | -56.84** | -49.47** | -45.99** | -95.92** |
| NZFMT-14/Renan | -4.10 | 13.28** | 0.33 | -33.66** | -26.83** | -16.01** | -13.95** |
| NZFMT-14/Esperia | -18.83** | 3.48 | -11.24** | -53.29** | -38.65** | -13.45** | 1.25 |
| NZFMT-15/Tekirdağ | -2.98 | 15.08** | 18.60** | -1.08 | -39.49** | -13.94** | 6.48* |
| NZFMT-15/Renan | -4.24 | 8.94** | 3.81 | -35.97** | -45.14** | -21.80** | 2.83 |
| NZFMT-15/Esperia | -3.82 | 14.17** | 3.14 | -22.90** | -26.77** | -12.37** | 12.50** |
| NZFMT-21/Tekirdağ | -9.14** | -3.70 | -17.34** | -19.79** | -29.77** | -35.54** | -49.89** |
| NZFMT-21/Renan | -14.30** | 10.48** | 13.72** | -14.18** | -27.71** | -16.31** | -56.38** |
| NZFMT-21/Esperia | -20.65** | 13.11** | -1.22 | -41.07** | -60.69** | -25.01** | -17.88** |
