# Supplementary material for: Heterotic grouping of wheat hybrids based on general and specific combining ability from line × tester analysis
Source: PeerJ. 2024 Sep 25;12:e18136. doi: 10.7717/peerj.18136 (PMC11438435; doi:10.7717/peerj.18136)
Supplement: Supplemental Information 9 [file peerj-12-18136-s009.docx]

**Suppl. Table 8.** Inbreeding depression values of hybrids for yield-related characteristics

| **Hybrids** | **PH** | **SL** | **GNS** | **GWS** | **TGW** | **HI** | **GY** |
| --- | --- | --- | --- | --- | --- | --- | --- |
| NZFE-64/Tekirdağ | -21.11** | 12.71** | 11.76** | -40.13** | -20.75** | -6.42* | 16.41** |
| NZFE-64/Renan | 6.40* | 8.47** | -9.68* | -47.76** | -44.36** | -29.59** | 17.07** |
| NZFE-64/Esperia | -14.56** | -21.28** | -37.42** | -110.50** | -36.91** | -30.96** | 4.57 |
| NZFE-63/Tekirdağ | -0.34 | 10.34** | 15.35** | 1.71 | -43.08** | -20.89** | -20.57** |
| NZFE-63/Renan | -4.63 | 19.71** | -0.45 | -9.36 | -29.30** | -14.60** | 5.21* |
| NZFE-63/Esperia | -10.56** | -4.39 | -21.37** | -64.30** | -31.56** | -19.07** | 19.38** |
| NZFE-62/Tekirdağ | -6.79** | 20.00** | -1.38 | -26.58** | -1.30 | -10.85** | -14.48** |
| NZFE-62/Renan | 0.62 | 12.60** | 2.15 | -26.42** | -27.54** | -22.26** | -29.15** |
| NZFE-62/Esperia | -13.19** | 7.63** | -35.29** | -124.19** | -39.83** | -8.42** | 0.31 |
| 4162-28/Tekirdağ | -1.18 | 10.17** | -0.39 | -41.02** | -20.25** | -12.36** | 23.61** |
| 4162-28/Renan | -9.14** | 7.81** | -49.74** | -60.55** | -2.74 | -6.70** | 10.40** |
| 4162-28/Esperia | -9.42** | 2.52 | -65.40** | -97.90** | -14.66** | -58.55** | -133.20** |
| 4166-1/Tekirdağ | 5.56* | 11.76** | -38.65** | -59.97** | -27.89** | -57.29** | -61.41** |
| 4166-1/Renan | -4.04 | 22.39** | -7.53 | -51.57** | -25.98** | -37.85** | -4.53 |
| 4166-1/Esperia | -10.64** | 5.05 | -36.90** | -97.18** | -45.34** | -47.18** | -109.69** |
| 4164-36/Tekirdağ | -20.40** | 6.96** | -47.78** | -78.69** | -15.21** | -79.24** | -174.88** |
| 4164-36/Renan | -8.14** | 11.20** | -18.03** | -33.60** | -4.14 | -24.70** | 0.00 |
| 4164-36/Esperia | -10.08** | 7.83** | -28.40** | -52.17** | -12.65** | -56.96** | -60.61** |
| NZFE-25/Tekirdağ | -14.79** | 3.45 | 6.75 | -39.33** | -59.17** | -13.67** | -27.88** |
| NZFE-25/Renan | -15.54** | 5.26* | -14.71** | -48.06** | -25.45** | -8.01** | -33.47** |
| NZFE-25/Esperia | -19.70** | 2.78 | -44.13** | -145.28** | -59.11** | -67.84** | -233.01** |
| NZFE-38/Tekirdağ | -11.90** | -6.48* | -31.47** | -75.25** | -37.77** | -60.56** | -102.65** |
| NZFE-38/Renan | -11.83** | 7.32** | -0.49 | -26.98** | -19.79** | -8.37** | 34.80** |
| NZFE-38/Esperia | -18.23** | -7.69** | -7.79* | -36.42** | -33.89** | -8.05** | -10.93** |
| NZFE-55/Tekirdağ | -19.80** | 10.53** | -7.64 | -50.99** | -47.22** | -32.50** | -23.76** |
| NZFE-55/Renan | -16.34** | -2.63 | -9.11* | -107.45** | -23.09** | -34.73** | -28.69** |
| NZFE-55/Esperia | -22.11** | 1.85 | -11.85** | -70.56** | -58.13** | -44.92** | -123.32** |
| NZFMT-14/Tekirdağ | -1.17 | 1.68 | 1.16 | -56.84** | -49.47** | -45.99** | -95.92** |
| NZFMT-14/Renan | -4.10 | 13.28** | 0.33 | -33.66** | -26.83** | -16.01** | -13.95** |
| NZFMT-14/Esperia | -18.83** | 3.48 | -11.24** | -53.29** | -38.65** | -13.45** | 1.25 |
| NZFMT-15/Tekirdağ | -2.98 | 15.08** | 18.60** | -1.08 | -39.49** | -13.94** | 6.48* |
| NZFMT-15/Renan | -4.24 | 8.94** | 3.81 | -35.97** | -45.14** | -21.80** | 2.83 |
| NZFMT-15/Esperia | -3.82 | 14.17** | 3.14 | -22.90** | -26.77** | -12.37** | 12.50** |
| NZFMT-21/Tekirdağ | -9.14** | -3.70 | -17.34** | -19.79** | -29.77** | -35.54** | -49.89** |
| NZFMT-21/Renan | -14.30** | 10.48** | 13.72** | -14.18** | -27.71** | -16.31** | -56.38** |
| NZFMT-21/Esperia | -20.65** | 13.11** | -1.22 | -41.07** | -60.69** | -25.01** | -17.88** |

*P<0,05 , ** P < 0,01 (PH: Plant height; SL: Spike length; GNS: Grain number per spike; GWS: Grain weight per spike; TGW: Thousand grain weight; HI: Harvest index; GY: Grain yield)
